# Supplementary material
Source: publisher figshare collection journal article supplement (https://tandf.figshare.com/ndownloader/files/24416337)
Supplement: Supplementary file 1 [file 24416337]

APPENDIX TO *Non-bifurcating phylogenetic tree inference via the adaptive LASSO*

**7.1. Lemmas.** Here we perform further theoretical development to establish the main theorems. We remind the reader that we will continue to assume Assumptions 2.1 and 2.2. The following lemma allows gives a lower bound on the fraction of sites with state assignments in a given set. It will prove useful to obtain an upper bound on the likelihood.

**Lemma 7.1.** *For any non-empty set  $A$  of single-site state assignments to the leaves, we define*

$$k_A = |\{i : \mathbf{Y}^i \in A\}|$$

*There exist  $c_3 > 0, c_4(\delta, n) > 0$  such that for all  $k$ , we have*

$$\frac{k_A}{k} \geq c_3 - \frac{c_4}{\sqrt{k}} \quad \forall A \neq \emptyset$$

*with probability at least  $1 - \delta$ .*

*Proof of Lemma 7.1.* Since the tree distance between any pairs of leaves of the true tree is strictly positive, there exists  $c_3 > 0$  such that  $P_{q^*}(\psi) \geq c_3$  for all state assignments  $\psi$ .

Using Hoeffding's inequality, for any state assignment  $\psi$ , we have

$$\mathbb{P} \left[ \left| \frac{k_{\{\psi\}}}{k} - P_{q^*}(\psi) \right| \geq t \right] \leq 2e^{-2kt^2}.$$

We deduce that

$$\mathbb{P} \left[ \exists \psi \text{ such that } \left| \frac{k_{\{\psi\}}}{k} - P_{q^*}(\psi) \right| \geq t \right] \leq 2e^{-2kt^2} \cdot 4^N.$$

For any given  $\delta > 0$ , by choosing

$$c_4(\delta, N) = \sqrt{\frac{\log(1/\delta) + (2N + 1) \log 2}{2}}$$

and  $t = c_4(\delta, N)/\sqrt{k}$  we have

$$\left| \frac{k_{\{\psi\}}}{k} - P_{q^*}(\psi) \right| \leq \frac{c_4(\delta, N)}{\sqrt{k}} \quad \forall \psi$$

with probability at least  $1 - \delta$ . This proves the Lemma.  $\square$

**Lemma 7.2** (Generalization bound). *There exists a constant  $C(\delta, n, Q, \eta, g_0, \mu) > 0$  such that for any  $k \geq 3, \delta > 0$ , we have:*

$$\left| \frac{1}{k} \ell_k(q) - \phi(q) \right| \leq C \left( \frac{\log k}{k} \right)^{1/2} \quad \forall q \in \mathcal{T}(\mu)$$

*with probability greater than  $1 - \delta$ .*

*Proof.* Note that for  $q \in \mathcal{T}(\mu)$ ,  $0 \geq \log P_q(\psi) \geq -\mu$  for all state assignments  $\psi$ . By Hoeffding's inequality,

$$\mathbb{P} \left[ \left| \frac{1}{k} \ell_k(q) - \phi(q) \right| \geq y/2 \right] \leq 2 \exp \left( -\frac{y^2 k}{2\mu^2} \right).$$

For each  $q \in \mathcal{T}(\mu)$ ,  $k > 0$ , and  $y > 0$ , define the events

$$A(q, k, y) = \left\{ \left| \frac{1}{k} \ell_k(q) - \phi(q) \right| > y/2 \right\}$$

and

$$B(q, k, y) = \left\{ \exists q' \in \mathcal{T}(\mu) \text{ such that } \|q' - q\|_2 \leq \frac{y}{4c_2} \text{ and } \left| \frac{1}{k} \ell_k(q) - \phi(q) \right| > y \right\}$$

then  $B(q, k, y) \subset A(q, k, y)$  by the triangle inequality, (3.3), and (3.4). Let

$$y = \sqrt{\frac{C \log k}{k}}$$

Since  $\mathcal{T}(\mu)$  is a subset of  $\mathbb{R}^{2N-3}$ , there exist  $C_{2N-3} \geq 1$  and a finite set  $\mathcal{H} \subset \mathcal{T}(\mu)$  such that

$$\mathcal{T}(\mu) \subset \bigcup_{q \in \mathcal{H}} V(q, \epsilon) \quad \text{and} \quad |\mathcal{H}| \leq C_{2N-3} / \epsilon^{2N-3}$$

where  $\epsilon = y/(4c_2)$ ,  $V(q, \epsilon)$  denotes the open ball centered at  $q$  with radius  $\epsilon$ , and  $|\mathcal{H}|$  denotes the cardinality of  $\mathcal{H}$ . By a simple union bound, we have

$$\mathbb{P} \left[ \exists q \in \mathcal{H} : \left| \frac{1}{k} \ell_k(q) - \phi(q) \right| > y/2 \right] \leq 2 \exp \left( -\frac{y^2 k}{2\mu^2} \right) C_{2N-3} / \epsilon^{2N-3}.$$

Using the fact that  $B(q, k, y) \subset A(q, k, y)$  for all  $q \in \mathcal{H}$ , we deduce

$$\mathbb{P} \left[ \exists q \in \mathcal{T}(\mu) : \left| \frac{1}{k} \ell_k(q) - \phi(q) \right| > y \right] \leq 2 \exp \left( -\frac{y^2 k}{2\mu^2} \right) C_{2N-3} / \epsilon^{2N-3}.$$

To complete the proof, we need to choose  $C$  in such a way that

$$C_{2N-3} \left( \frac{4\sqrt{k}g_0c_2}{\sqrt{C \log k}} \right)^{2N-3} \times 2 \exp \left( -\frac{C \log k}{2\mu^2} \right) \leq \delta.$$

Since  $k \geq 3$  and  $C \geq 1$ , the inequality is valid if

$$C_{2N-3} (4g_0c_2)^{2N-3} \times 2k^{\frac{2N-3}{2} - \frac{C}{2\mu^2}} \leq \delta$$

and can be obtained if

$$\frac{2N-3}{2} - \frac{C}{2\mu^2} < 0, \quad \text{and} \quad C_{2N-3} (4g_0c_2)^{2N-3} \times 2 \cdot 3^{\frac{2N-3}{2} - \frac{C}{2\mu^2}} \leq \delta.$$

In other words, we need to choose  $C$  such that

$$C \geq 2\mu^2 \left( \log(1/\delta) + \log C_{2N-3} + (2N-3) \log(4\sqrt{3}g_0c_2) \right).$$

This completes the proof.  $\square$

## 7.2. Proofs of main theorems.

*Proof of Theorem 3.10.* By definition of the estimator, we have

$$-\frac{1}{k} \ell_k(q^{k, R_k}) + \lambda_k R_k(q^{k, R_k}) \leq -\frac{1}{k} \ell_k(q^*) + \lambda_k R_k(q^*)$$

which is equivalent to  $U_k(q^{k, R_k}) \leq \lambda_k R_k(q^*) - \lambda_k R_k(q^{k, R_k})$ .

We have  $q^{k, R_k} \in \mathcal{T}(\mu)$  with probability at least  $1 - 2\delta$  from Lemma 3.9 for  $k$  sufficiently large. Therefore by Lemma 3.6,

$$\mathbb{E}[U_k(q^{k, R_k})] \leq \frac{1}{k} \quad \text{or} \quad \frac{1}{2} \mathbb{E}[U_k(q^{k, R_k})] \leq U_k(q^{k, R_k}) + \frac{C \log k}{k^{2/\beta}},$$

with probability at least  $1 - 3\delta$ . The second case implies that

$$\begin{aligned} \frac{c_1^\beta}{2} \|q^{k,R_k} - q^*\|_2^\beta &\leq \frac{1}{2} \mathbb{E}[U_k(q^{k,R_k})] \\ &\leq \lambda_k R_k(q^*) - \lambda_k R_k(q^{k,R_k}) + \frac{C \log k}{k^{2/\beta}} \leq \frac{C \log k}{k^{2/\beta}} + \lambda_k R_k(q^*) \end{aligned}$$

while for the first case, we have

$$\frac{c_1^\beta}{2} \|q^{k,R_k} - q^*\|_2^\beta \leq \mathbb{E}[U_k(q^{k,R_k})] \leq \frac{1}{k} \leq \frac{C \log k}{k^{2/\beta}} + \lambda_k R_k(q^*)$$

since  $\beta \geq 2$  and  $C \geq 1$ . This demonstrates (3.7).

If the additional assumption (3.6) is satisfied, we also have

$$\|q^{k,R_k} - q^*\|_2^\beta \leq \frac{C' \log k}{k^{2/\beta}} + C_3 \lambda_k \|q^{k,R_k} - q^*\|_2.$$

Using Lemma 3.7 with

$$\nu = 1/\beta, \quad x = \|q^{k,R_k} - q^*\|_2^\beta, \quad a = C_3 \lambda_k \quad \text{and} \quad b = \frac{C' \log k}{k^{2/\beta}},$$

we obtain

$$x \leq C_1 a^{1/(1-\nu)} + C_2 b,$$

which implies

$$\|q^{k,R_k} - q^*\|_2^\beta \leq C'(\delta, C_3) \left( \frac{\log k}{k^{2/\beta}} + \lambda_k^{\beta/(\beta-1)} \right).$$

This completes the proof.  $\square$

*Proof of Theorem 3.11.* We first note that by Theorem 3.10, the estimator  $q^{k,R_k}$  is consistent, which guarantees  $\lim_{k \rightarrow \infty} q^{k,R_k} = q^*$  almost surely. Thus

$$\lim_{k \rightarrow \infty} S_k(q^*) = \lim_{k \rightarrow \infty} \sum_{q_i^* \neq 0} (q_i^*)^{1-\gamma} < \infty.$$

The hypotheses of this theorem imply that  $\lambda_k \rightarrow 0$  and thus by Theorem 3.10, we also deduce that  $q^{k,S_k}$  is also a consistent estimator. This validates (i).

To establish topological consistency under (ii), we divide the proof into two steps.

As the first step, we prove that  $\lim_k \mathbb{P}(\mathcal{A}(q^*) \subset \mathcal{A}(q^{k,S_k})) = 1$ . If  $q_{i_0}^* = 0$  for some  $i_0$ , then from Theorem 3.10, we have

$$q_{i_0}^{k,R_k} \leq C'(\delta) \left( \frac{\log k}{k^{2/\beta}} + \lambda_k^{\beta/(\beta-1)} \right)^{1/\beta} \quad \forall k$$

with probability at least  $1 - \delta$ . By the definition of  $w_{k,i_0}$ , we have

$$\begin{aligned} \lim_{k \rightarrow \infty} \alpha_k w_{k,i_0} &\geq \lim_{k \rightarrow \infty} \alpha_k (C'(\delta))^{-\gamma} \left( \frac{\log k}{k^{2/\beta}} + \lambda_k^{\beta/(\beta-1)} \right)^{-\gamma/\beta} \\ &= (C'(\delta))^{-\gamma} \lim_{k \rightarrow \infty} \left( \frac{\log k}{\alpha_k^{\beta/\gamma} k^{2/\beta}} + \alpha_k^{-\beta/\gamma} \lambda_k^{\beta/(\beta-1)} \right)^{-\gamma/\beta} \end{aligned}$$

which goes to infinity since by the hypotheses of the Theorem

$$\alpha_k^{\beta/\gamma} \succ \frac{\log k}{k^{2/\beta}} \quad \text{and} \quad \alpha_k^{\beta/\gamma} \succ \lambda_k^{\beta/(\beta-1)}.$$

Since  $\delta > 0$  is arbitrary, we deduce that  $\lim_{k \rightarrow \infty} \alpha_k w_{k,i_0} = \infty$  with probability one.

Now for any branch length vector  $q$ , we define  $f(q)$  as the vector obtained from  $q$  by setting the  $i_0$  component of  $q$  to 0. By definition of the estimator  $q^{k,S_k}$ , we have

$$-\frac{1}{k} \ell_k(q^{k,S_k}) + \alpha_k \sum_i w_{k,i} q_i^{k,S_k} \leq -\frac{1}{k} \ell_k(f(q^{k,S_k})) + \alpha_k \sum_i w_{k,i} [f(q^{k,S_k})]_i$$

or equivalently

$$\alpha_k w_{k,i_0} q_{i_0}^{k,S_k} \leq \frac{1}{k} \ell_k(q^{k,S_k}) - \frac{1}{k} \ell_k(f(q^{k,S_k})).$$

Lemma 3.8 establishes that there exist,  $\mu^* > 0$  and a neighborhood  $V$  of  $q^*$  in  $\mathcal{T}$  such that  $V \subset \mathcal{T}(\mu^*)$ . Since the estimator  $q^{k,S_k}$  is consistent and  $q_{i_0}^* = 0$ , we can assume that both  $q^{k,S_k}$  and  $f(q^{k,S_k})$  belong to  $\mathcal{T}(\mu^*)$  with  $k$  large enough. Thus, from Lemma 3.5, we have

$$\left| \frac{1}{k} \ell_k(q^{k,S_k}) - \frac{1}{k} \ell_k(f(q^{k,S_k})) \right| \leq c_2 \|q^{k,S_k} - f(q^{k,S_k})\|_2 = c_2 q_{i_0}^{k,S_k}.$$

If  $q_{i_0}^{k,S_k} > 0$ , we deduce that  $\alpha_k w_{k,i_0}$  is bounded from above by  $c_2$ , which is a contradiction. This implies that  $q_{i_0}^{k,S_k} = 0$ , and we conclude that

$$\lim_k \mathbb{P}(\mathcal{A}(q^*) \subset \mathcal{A}(q^{k,S_k})) = 1.$$

As the second step, we prove that  $\lim_k \mathbb{P}(\mathcal{A}(q^{k,S_k}) \subset \mathcal{A}(q^*)) = 1$ . Indeed, the consistency of  $q^{k,S_k}$  guarantees that

$$\lim_{k \rightarrow \infty} q^{k,S_k} = q^*$$

almost surely. Therefore, if  $q_{i_0}^* > 0$  for some  $i_0$ , then  $q_{i_0}^{k,S_k} > 0$  for  $k$  large enough. In other words, we have  $\lim_k \mathbb{P}(\mathcal{A}(q^{k,S_k}) \subset \mathcal{A}(q^*)) = 1$ .

Combing step 1 and step 2, we deduce that the adaptive estimator is topologically consistent.  $\square$

*Proof of Lemma 3.12.* Since  $q^{k,S_k}$  is topologically consistent and  $q^{k,R_k}$  is consistent, we have

$$\mathcal{A}(q^{k,S_k}) = \mathcal{A}(q^*) \quad \text{and} \quad q_i^{k,R_k} \geq q_i^*/2 \quad \forall i \notin \mathcal{A}(q^*)$$

with probability one for sufficiently large  $k$ . Defining  $b = \min_{i \notin \mathcal{A}(q^*)} q_i^*$ , we have

$$|S_k(q^{k,S_k}) - S_k(q^*)| = \left| \sum_{q_i^* \neq 0} w_{k,i} (q_i^{k,S_k} - q_i^*) \right| \leq \sqrt{2N-3} (b/2)^{-\gamma} \|q^{k,S_k} - q^*\|_2$$

via Cauchy-Schwarz which completes the proof.  $\square$

*Proof of Theorem 3.13.* We note that for the LASSO estimator,  $R_k^{[0]}(q^*) = \sum_i q_i^*$  is uniformly bounded from above. Hence, the LASSO estimator is consistent. We can then use this as the base case to prove, by induction, that adaptive LASSO and the multiple-step LASSO are consistent via Theorem 3.11 (part (i)). Moreover,  $R_k^{[0]}$  is uniformly Lipschitz and satisfies (3.6), so using part (ii) of Theorem 3.11, we deduce that adaptive LASSO (i.e., the estimator with penalty function  $R_k^{[1]}$ ) is topologically consistent.

We will prove that the multiple-step LASSOs are topologically consistent by induction. Assume that  $q^{k, R_k^{[m]}}$  is topologically consistent, and that  $q^{k, R_k^{[m-1]}}$  is consistent. From Lemma 3.12, we deduce that there exists  $C > 0$  independent of  $k$  such that

$$(7.1) \quad \left| R_k^{[m]} \left( q^{k, R_k^{[m]}} \right) - R_k^{[m]}(q^*) \right| \leq C \left\| q^{k, R_k^{[m]}} - q^* \right\|_2 \quad \forall k.$$

This enables us to use part (ii) of Theorem 3.11 to conclude that  $q^{k, R_k^{[m+1]}}$  is topologically consistent. This inductive argument proves part (i) of the Theorem. We can now use (7.1) and Theorem 3.10 to derive the convergence rate of the estimators.  $\square$

### 7.3. Technical proofs.

**Lemma 2.3.** *If the penalty  $R_k$  is continuous on  $\mathcal{T}$ , then for  $\lambda > 0$  and observed sequences  $\mathbf{Y}^k$ , there exists a  $q \in \mathcal{T}$  minimizing*

$$Z_{\lambda, \mathbf{Y}^k}(q) = -\frac{1}{k} \ell_k(q) + \lambda R_k(q).$$

*Proof of Lemma 2.3.* Let  $\{q^n\}$  be a sequence such that

$$Z_{\lambda, \mathbf{Y}^k}(q^n) \rightarrow \nu := \inf_q Z_{\lambda, \mathbf{Y}^k}(q).$$

We note that since  $\ell_k(q^*) \neq -\infty$  and  $R_k$  is continuous on the compact set  $\mathcal{T}$ ,  $\nu$  is finite. Since  $\mathcal{T}$  is compact, we deduce that a subsequence  $\{q^m\}$  converges to some  $q^0 \in \mathcal{T}$ . Since the log likelihood (defined on  $\mathcal{T}$  with values in the extended real line  $[-\infty, 0]$ ) and the penalty  $R_k$  are continuous, we deduce that  $q^0$  is a minimizer of  $Z_{\lambda, \mathbf{Y}^k}$ .  $\square$

**Lemma 3.5.** *For any  $\mu > 0$ , there exists a constant  $c_2(N, Q, \eta, g_0, \mu) > 0$  such that*

$$(3.3) \quad \left| \frac{1}{k} \ell_k(q) - \frac{1}{k} \ell_k(q') \right| \leq c_2 \|q - q'\|_2$$

and

$$(3.4) \quad |\phi(q) - \phi(q')| \leq c_2 \|q - q'\|_2$$

for all  $q, q' \in \mathcal{T}(\mu)$ .

*Proof of Lemma 3.5.* Using the same arguments as in the proof of Lemma 4.2 of Dinh et al. (2018), we have

$$\left| \frac{\partial P_q(\psi)}{\partial q_i} \right| \leq \varsigma 4^n$$

for any state assignment  $\psi$  where  $\varsigma$  is the element of largest magnitude in the rate matrix  $Q$ . By the Mean Value Theorem, we have

$$|\log P_q(\psi) - \log P_{q'}(\psi)| \leq c_2 \sqrt{2N-3} \|q - q'\|_2 \quad \forall q, q', \psi$$

where  $c_2 := \varsigma 4^n / e^{-\mu}$ , and  $\|\cdot\|_2$  is the  $\ell_2$ -distance in  $\mathbb{R}^{2N-3}$ . This implies both (3.3) and (3.4).  $\square$

**Lemma 3.6.** *Let  $G_k$  be the set of all branch length vectors  $q \in \mathcal{T}(\mu)$  such that  $\mathbb{E}[U_k(q)] \geq 1/k$ . Let  $\beta \geq 2$  be the constant in Lemma 3.3. For any  $\delta > 0$  and previously specified variables there exists  $C(\delta, N, Q, \eta, g_0, \mu, \beta) \geq 1$  (independent of  $k$ ) such that for any  $k \geq 3$ , we have:*

$$U_k(q) \geq \frac{1}{2}\mathbb{E}[U_k(q)] - \frac{C \log k}{k^{2/\beta}} \quad \forall q \in G_k$$

with probability greater than  $1 - \delta$ .

*Proof of Lemma 3.6.* The difference of average likelihoods  $U_k(q)$  is bounded by Lemma 3.5 and the boundedness assumption on  $\mathcal{T}$ , thus by Hoeffding's inequality

$$\mathbb{P}[U_k(q) - \mathbb{E}[U_k(q)] \leq -y] \leq \exp\left(-\frac{2y^2k}{c_2^2\|q - q^*\|^2}\right).$$

By choosing  $y = \frac{1}{2}\mathbb{E}[U_k(q)] + t/2$ , we have  $y^2 \geq t\mathbb{E}[U_k(q)]$ . For any  $q \in G_k$ , we deduce using (3.5) (and the fact that  $\beta \geq 2$ ) that

$$\mathbb{P}\left[U_k(q) \leq \frac{1}{2}\mathbb{E}[U_k(q)] - t/2\right] \leq \exp\left(-\frac{2c_1^2tk\mathbb{E}[U_k(q)]}{c_2^2\mathbb{E}[U_k(q)]^{2/\beta}}\right) \leq \exp\left(-\frac{2c_1^2tk^{2/\beta}}{c_2^2}\right).$$

For each  $q \in G_k$ , define the events

$$A(q, k, t) = \left\{U_k(q) - \frac{1}{2}\mathbb{E}[U_k(q)] \leq -t/2\right\}$$

and

$$B(q, k, t) = \left\{\exists q' \in G_k \text{ such that } \|q' - q\|_2 \leq \frac{t}{4c_2} \text{ and } U_k(q') - \frac{1}{2}\mathbb{E}[U_k(q')] \leq -t\right\}$$

then  $B(q, k, t) \subset A(q, k, t)$  by the triangle inequality, (3.3), and (3.4). Let

$$t = \frac{C \log k}{k^{2/\beta}}.$$

To obtain a union bound and complete the proof, we need to choose  $C$  in such a way that

$$C_{2N-3} \left(\frac{4k^{2/\beta}g_0c_2}{C \log k}\right)^{2N-3} \times 2 \exp\left(-\frac{2c_1^2C \log k}{c_2^2}\right) \leq \delta$$

where  $C_{2N-3}$  is defined as in the proof of Lemma 7.2. This can be done by choosing

$$C \geq \frac{4\beta c_2^2}{9c_1^2} \left(\log(1/\delta) + \log C_{2N-3} + (2N-3) \log(4 \cdot 3^{2/\beta}g_0c_2)\right).$$

□

**Lemma 3.8.** *There exist  $\mu^* > 0$  and an open neighborhood  $V$  of  $q^*$  in  $\mathcal{T}$  such that  $V \subset \mathcal{T}(\mu^*)$ .*

*Proof of Lemma 3.8.* Let

$$\mu^* = -2 \min_{\psi} \log P_{q^*}(\psi)$$

then we have  $\log P_{q^*}(\psi) > -\mu^*$  for all state assignments  $\psi$ .

For a fixed value of  $\psi$ ,  $\log P_q(\psi)$  is a continuous function of  $q$  around  $q^*$ . Hence, there exists an neighborhood  $V_\psi$  of  $q^*$  such that  $V_\psi$  is open in  $\mathcal{T}$  and  $\log P_q(\psi) > -\mu^*$ . Let  $V = \cap_{\psi} V_\psi$ . Because the set of all possible labels  $\psi$  of the leaves is finite,  $V$  is open in  $\mathcal{T}$  and

$$\log P_q(\psi) > -\mu^* \quad \forall \psi, \forall q \in V.$$

In other words, we have  $V \subset \mathcal{T}(\mu^*)$ .  $\square$

**Lemma 3.9.** *If the sequence  $\{\lambda_k R_k(q^*)\}$  is bounded, then for any  $\delta > 0$ , there exist  $\mu(\delta) > 0$  and  $K(\delta) > 0$  such that for all  $k \geq K$ ,  $q^{k,R_k} \in \mathcal{T}(\mu)$  with probability at least  $1 - 2\delta$ .*

*Proof of Lemma 3.9.* We first assume that  $\mu > \mu^*$ , where  $\mu^*$  is defined in Lemma 3.8. Thus, we have  $q^* \in \mathcal{T}(\mu^*) \subset \mathcal{T}(\mu)$ . By definition, we have

$$-\frac{1}{k}\ell_k(q^{k,R_k}) + \lambda_k R_k(q^{k,R_k}) \leq -\frac{1}{k}\ell_k(q^*) + \lambda_k R_k(q^*)$$

which implies via Lemma 7.2 that

$$(7.2) \quad \phi(q^*) - C(\delta) \frac{\log k}{\sqrt{k}} + \lambda_k R_k(q^{k,R_k}) - \lambda_k R_k(q^*) \leq \frac{1}{k}\ell_k(q^{k,R_k})$$

with probability at least  $1 - \delta$ .

Let  $c_3$  and  $c_4(\delta, N)$  be as in Lemma 7.1, and assume that  $k$  is large enough such that

$$(7.3) \quad c_3 - c_4(\delta, N) \frac{\log k}{\sqrt{k}} > 0.$$

Denoting the upper bound of  $\{\lambda_k R_k(q^*)\}$  by  $U$ , we define

$$\mu = \max \left\{ -2 \left( c_3 - c_4(\delta, N) \frac{\log k}{\sqrt{k}} \right)^{-1} \left( \phi(q^*) - C(\delta) \frac{\log k}{\sqrt{k}} - U \right), \mu^* \right\}.$$

If we assume that  $q^{k,R_k} \notin \mathcal{T}(\mu)$ , then the set  $I = \{\psi : \log P_{q^{k,R_k}}(\psi) \leq -\mu\}$  is non-empty. Using Lemma 7.1, we have

$$(7.4) \quad \frac{1}{k}\ell_k(q^{k,R_k}) \leq \frac{1}{k} \sum_{Y_i \in I} \log P_{q^{k,R_k}}(Y_i) \leq -\mu \cdot \frac{k_I}{k} \leq -\mu \cdot \left( c_3 - c_4(\delta) \frac{\log k}{\sqrt{k}} \right)$$

with probability at least  $1 - \delta$ .

Combining equations (7.2) and (7.4), and using the fact that  $\{\lambda_k R_k(q^*)\}$  is bounded by  $U$ , we obtain

$$\phi(q^*) - C(\delta) \frac{\log k}{\sqrt{k}} - U \leq -\mu \cdot \left( c_3 - c_4(\delta, N) \frac{\log k}{\sqrt{k}} \right).$$

This contradicts the choice of  $\mu$  for  $k$  large enough such that (7.3) holds.

We deduce that  $q^{k,R_k} \in \mathcal{T}(\mu)$  with probability at least  $1 - 2\delta$ .  $\square$

**7.4. More experimental results.** Here we present additional experimental results for the case of  $\gamma > 1$ .

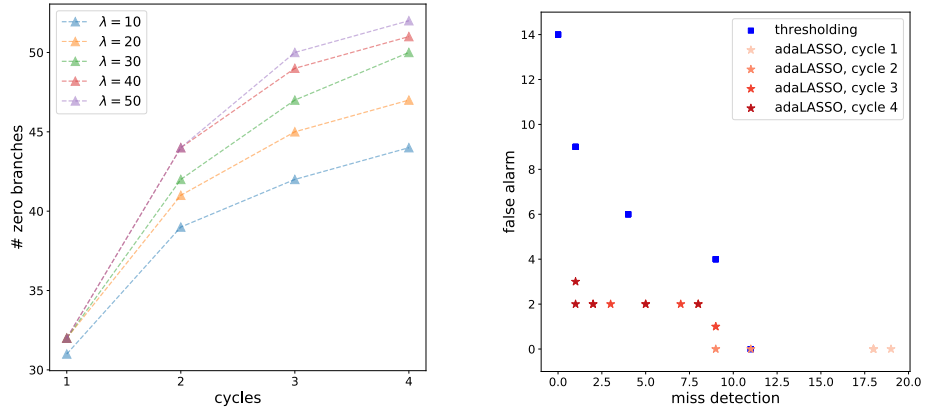

FIGURE S1. Topological consistency comparison of different phylogenetic LASSO procedures on simulation 2.  $\gamma = 1.01$ .

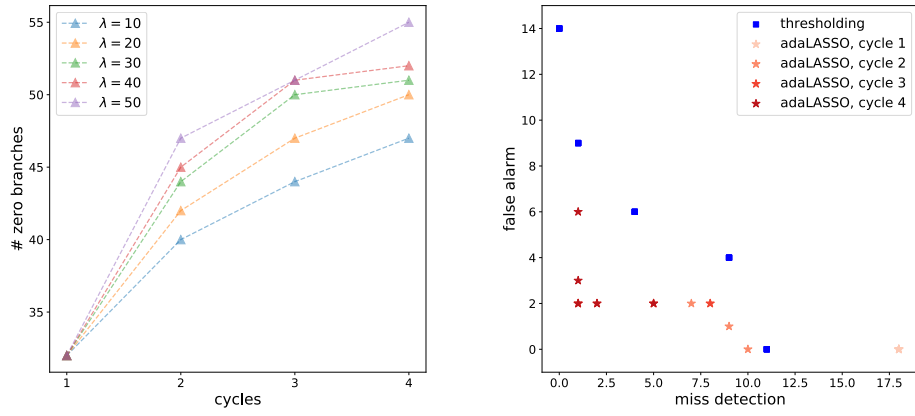

FIGURE S2. Topological consistency comparison of different phylogenetic LASSO procedures on simulation 2.  $\gamma = 1.1$ .



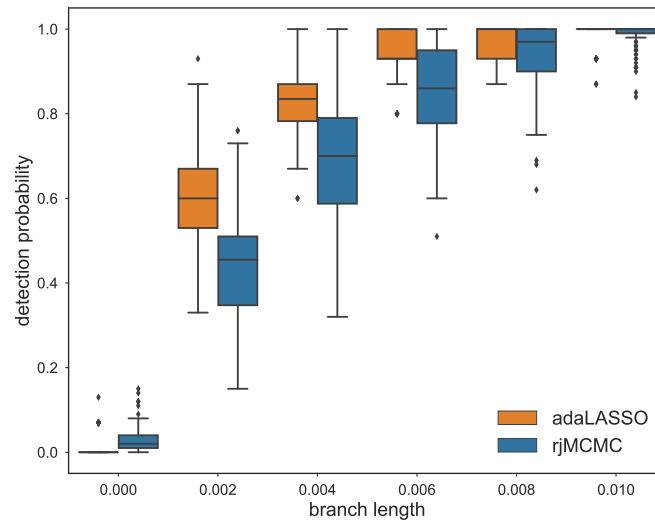

FIGURE S3. Box plot showing performance of multistep adaptive phylogenetic LASSO and rjMCMC at detecting short branches.  $\gamma = 1.1$
